# Supplementary material for: Heart failure from cancer therapy: can we prevent it?
Source: PubMed Central journal article supplement — ESC Heart Fail. 2019 Jul 11;6(4):856–62. doi: 10.1002/ehf2.12493 (PMC6676296; doi:10.1002/ehf2.12493), 2019-07-11

### Supplementary Figure 1

Risk of bias in the beta-blockers meta-analysis. Studies with high precision are plotted near the average, and studies with low precision are spread evenly on both sides of the average, creating a roughly funnel-shaped distribution, which indicates a non-significant publication bias (Egger's test).

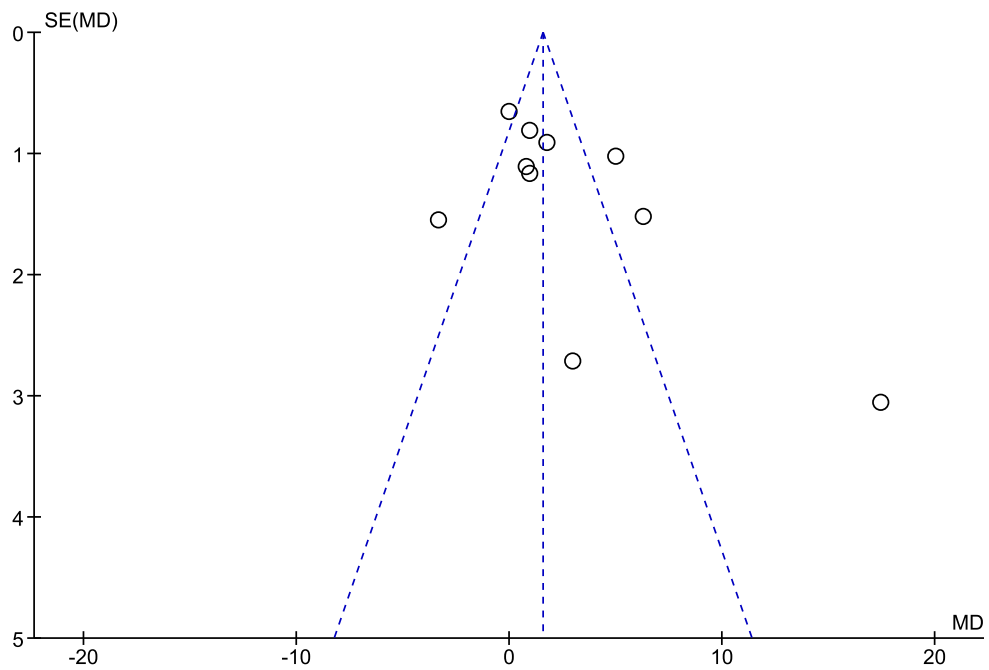

Supplement: EHF2-6-856-s001.pdf [file EHF2-6-856-s001.pdf]
